# Supplementary material for: Absorption, fluorescence, Raman spectroscopic and density functional theoretical studies on the singlet and triplet excited state decay of 3-amino-5-mercapto-1,2,4-triazole
Source: Royal Society of Chemistry journal article supplement (doi:10.1039/d0ra01628d), 2020-01-01
Supplement: d0ra01628d1.pdf [file d0ra01628d1.pdf]

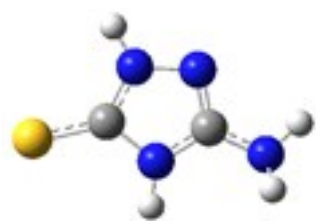

(a) 1,4H-AMTN:0

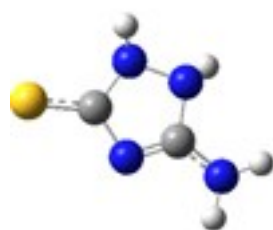

(b) 1,2H-AMTN:12.1

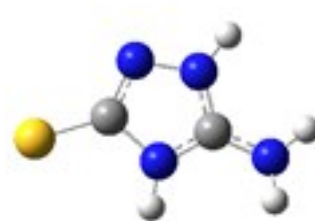

(c) 2,4H-AMTN:19.5

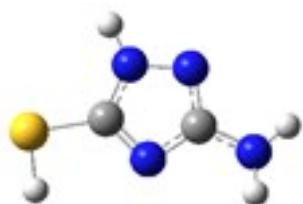

(d) 1H-AMTL:4.66

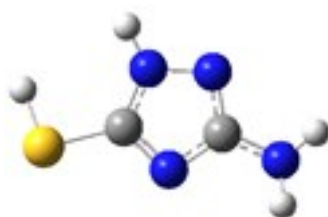

(e) 1H-AMTL-it:6.11

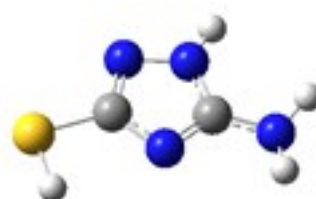

(f) 2H-AMTL:5.51

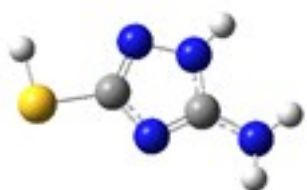

(g) 2H-AMTL-it:5.35

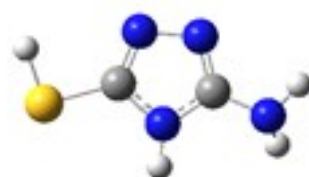

(h) 4H-AMTL:13.1

**Figure S1.** Optimized tautomers of AMT and the energies (in kcal/mol) relative to structure (a) at B3LYP-D3(BJ)/6-311++G(d, p) level.

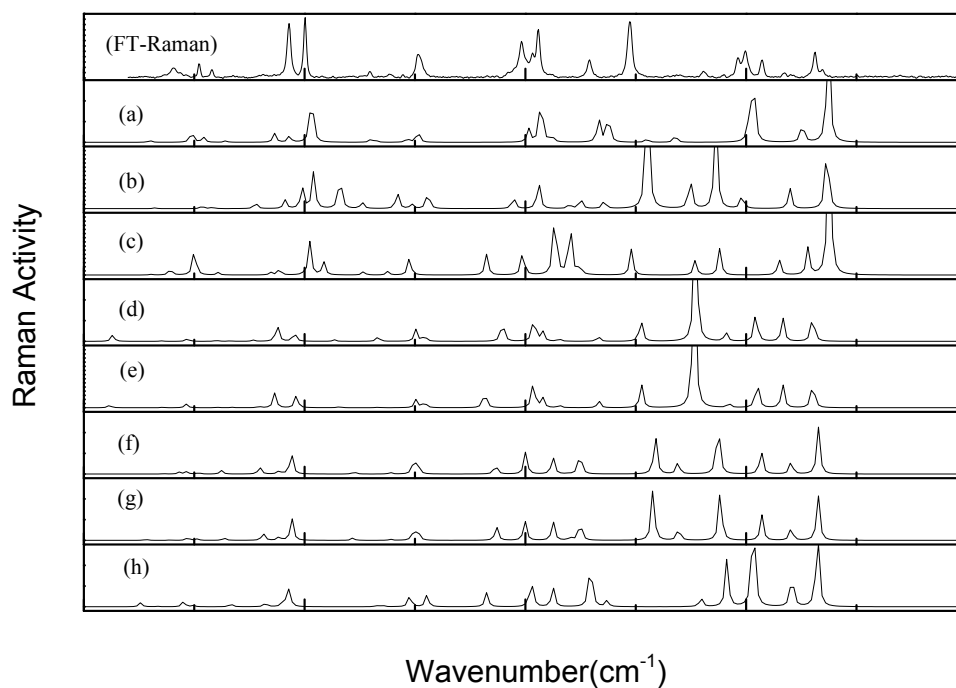

**Figure S2.** FT-Raman and calculated Raman activities (a), (b), (c), (d),(e), (f), (g) and (h) for the optimized isomers in Figure S1 at B3LYP-D3(BJ)/6-311++G(d, p) level.

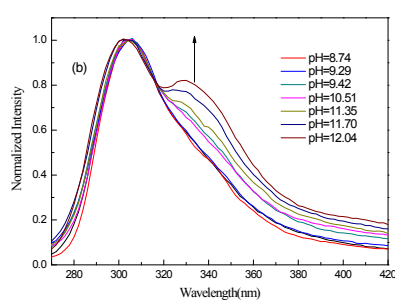

**Figure S3.** (a) UV absorption and (b) emission ( $\lambda_{\text{ex}}=230$  nm) spectra for AMT ( $4.78 \times 10^{-5}$  mol/L) in  $\text{CH}_3\text{OH}$  with different volume of  $[(\text{Bu})_4 \text{N}]^+\text{OH}^-$  (**1.53** mol/L).

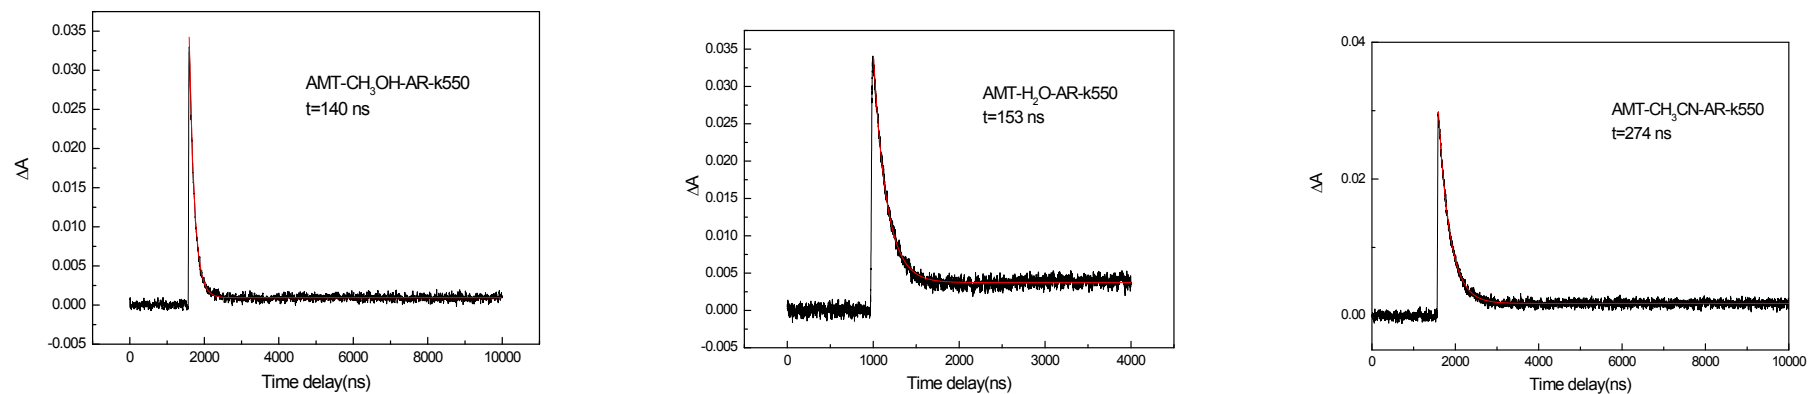

**Figure S4.** Kinetics of  $^3\text{AMT}$  measured at 550 nm in  $\text{CH}_3\text{CN}$ ,  $\text{CH}_3\text{OH}$  and  $\text{H}_2\text{O}$  and fitted with a single exponential function, the time constants are listed close to the curves.

**Notes:** Based on the experimental results, as shown in Figure S4, the solvents induce transient absorption spectra not return to the baseline due to its polarity, especially the hydrogen bonding interaction effect on the excited state structure.

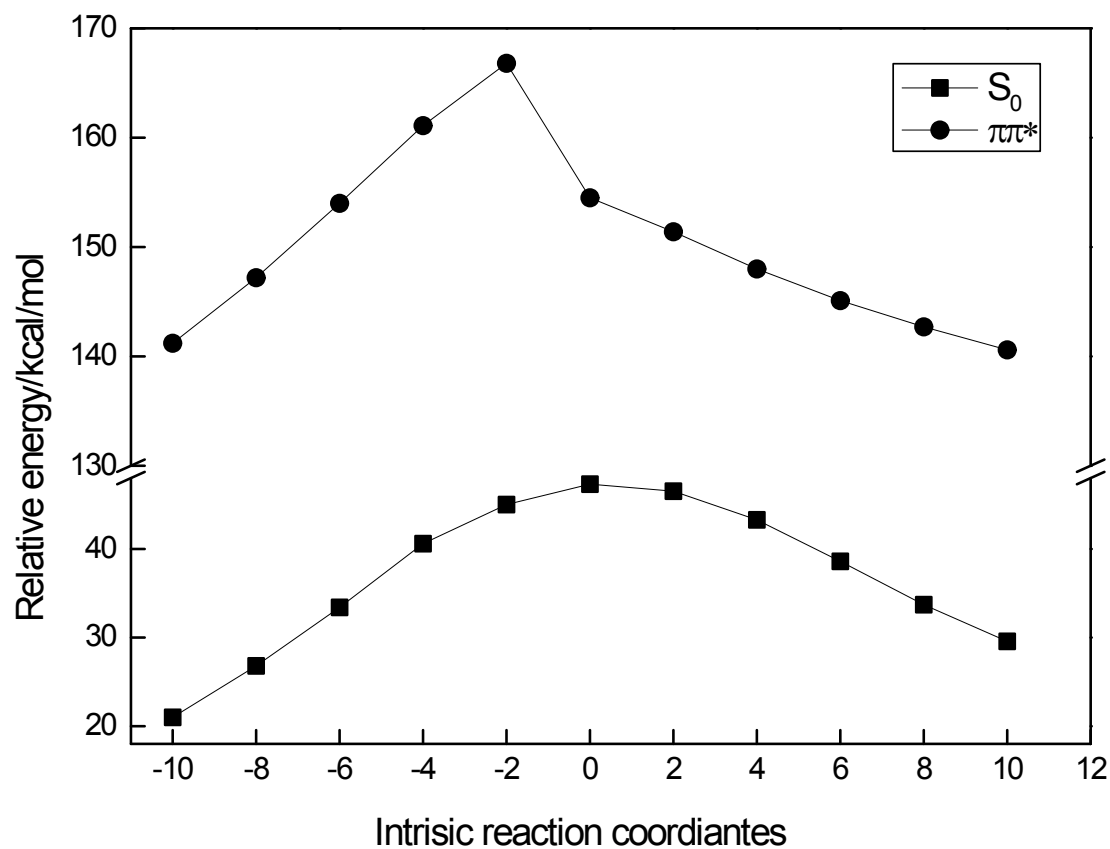

**Figure S5.** Calculated energies (kcal/mol) of  $S_0$  (circle) and  $\pi\pi^*$  (rectangular) states relative to ground state thione AMT on the selected IRC points at B3LYP(TD)-D3(BJ)/6-31G\* level.

**Table S1.** Experimental and calculated vibrational frequencies at B3LYP-D3(BJ)/6-311++G(d, p) level and assignments of thione AMT in gas phase.

| Modes      | Calc                             | Exp      |       | Description (PED%)                                                                                      |
|------------|----------------------------------|----------|-------|---------------------------------------------------------------------------------------------------------|
|            | (Raman activity<br>/IR activity) | FT-raman | FT-IR |                                                                                                         |
| $\nu_1$    | 3684(88.1/104)                   |          |       | $N_1H_6(99)$ stretch                                                                                    |
| $\nu_2$    | 3662(57.3/65.9)                  |          |       | $N_4H_{11}(99)$ stretch                                                                                 |
| $\nu_3$    | 3644(73.1/37.8)                  |          |       | $N_7H_8(58)+N_7H_9(42)$ stretch                                                                         |
| $\nu_4$    | 3549(242/30.9)                   |          |       | $N_7H_8(42)+N_7H_9(58)$ stretch                                                                         |
| $\nu_5$    | 1686(53.0/333)                   | 1655     | 1647  | $N_2C_3(35)$ stretch + $N_7C_3(23)$ stretch + $H_9N_7H_8(19)$ bend                                      |
| $\nu_6$    | 1628(9.39/31.8)                  | 1585     | 1589  | $N_2C_3(13)$ stretch + $H_9N_7H_8(59)$ bend                                                             |
| $\nu_7$    | 1517(26.2/505)                   | 1498     | 1546  | $N_1C_5(33)$ stretch + $N_4C_3(14)$ stretch + $H_6N_1N_2(18)$ bend + $H_{11}N_4C_3(13)$ bend            |
| $\nu_8$    | 1508(12.9/8.97)                  |          | 1482  | $N_4C_3(19)$ stretch + $N_7C_3(15)$ stretch + $H_6N_1N_2(19)$ bend + $N_1N_2C_3(14)$ bend               |
| $\nu_9$    | 1340(3.24/21.4)                  | 1402     | 1391  | $H_6N_1N_2(32)$ bend + $H_{11}N_4C_3(30)$ bend + $C_5N_1N_2(12)$ bend                                   |
| $\nu_{10}$ | 1275(1.46/2.19)                  | 1344     |       | $N_1C_5(32)$ stretch + $C_5N_1N_2(29)$ bend                                                             |
| $\nu_{11}$ | 1188(12.2/49.4)                  | 1236     | 1239  | $N_7C_3(11)$ stretch + $N_1N_2(12)$ stretch + $H_{11}N_4C_3(19)$ bend + $H_8N_7C_3(10)$ bend            |
| $\nu_{12}$ | 1166(9.87/109)                   | 1144     | 1143  | $N_1N_2(21)$ stretch + $S_{10}C_5(18)$ stretch + $H_{11}N_4C_3(13)$ bend + $H_8N_7C_3(25)$ bend         |
| $\nu_{13}$ | 1060(2.37/45.1)                  |          | 1068  | $N_4C_3(17)$ stretch + $N_1N_2(36)$ stretch + $H_8N_7C_3(23)$ bend                                      |
| $\nu_{14}$ | 1035(19.2/11.8)                  | 1028     |       | $N_2C_3(18)$ stretch + $N_4C_3(15)$ stretch + $N_1N_2(10)$ stretch + $N_4C_3N_2(42)$ bend               |
| $\nu_{15}$ | 1008(4.83/8.83)                  | 991      |       | $N_4C_3(15)$ stretch + $N_1N_2C_3(42)$ bend                                                             |
| $\nu_{16}$ | 757(4.38/8.96)                   | 758      | 755   | $N_7C_3(27)$ stretch + $N_4C_3N_2(19)$ bend + $N_1N_2C_3(42)$ bend                                      |
| $\nu_{17}$ | 732(1.40/83.0)                   | 723      | 706   | $H_9N_7C_3N_4(11)$ tors + $N_4C_3N_2N_1(25)$ tors + $N_7N_4N_2C_3(34)$ out                              |
| $\nu_{18}$ | 660(0.795/154)                   | 692      |       | $H_8N_7C_3N_4(24)$ tors + $H_9N_7C_3N_4(11)$ tors + $C_5N_1N_2C_3(12)$ tors + $S_{10}N_1N_4C_5(29)$ out |

|                 |                 |     |     |                                                                                                                                                                                                                                                                                      |
|-----------------|-----------------|-----|-----|--------------------------------------------------------------------------------------------------------------------------------------------------------------------------------------------------------------------------------------------------------------------------------------|
| v <sub>19</sub> | 649(0.804/47.7) | 646 | 639 | H <sub>6</sub> N <sub>1</sub> N <sub>2</sub> C <sub>3</sub> (11)tors+H <sub>8</sub> N <sub>7</sub> C <sub>3</sub> N <sub>4</sub> (22)tors+C <sub>5</sub> N <sub>1</sub> N <sub>2</sub> C <sub>3</sub> (24)tors+ S <sub>10</sub> N <sub>1</sub> N <sub>4</sub> C <sub>5</sub> (16)out |
| v <sub>20</sub> | 518(9.56/94.7)  | 501 | 513 | S <sub>10</sub> C <sub>5</sub> (21)strech+C <sub>5</sub> N <sub>1</sub> N <sub>2</sub> (10)bend+H <sub>6</sub> N <sub>1</sub> N <sub>2</sub> C <sub>3</sub> (13)tors+H <sub>11</sub> N <sub>4</sub> C <sub>3</sub> N <sub>7</sub> (31)tors                                           |
| v <sub>21</sub> | 513(7.47/72.1)  |     | 497 | S <sub>10</sub> C <sub>5</sub> (22)stretch+C <sub>5</sub> N <sub>1</sub> N <sub>2</sub> (11)bend+H <sub>6</sub> N <sub>1</sub> N <sub>2</sub> C <sub>3</sub> (11)tors+H <sub>11</sub> N <sub>4</sub> C <sub>3</sub> N <sub>7</sub> (25)tors                                          |
| v <sub>22</sub> | 467(2.15/28.2)  | 465 | 467 | N <sub>7</sub> C <sub>3</sub> N <sub>2</sub> (12)bend+C <sub>5</sub> N <sub>1</sub> N <sub>2</sub> (45)bend+H <sub>11</sub> N <sub>4</sub> C <sub>3</sub> N <sub>7</sub> (16)tors                                                                                                    |
| v <sub>23</sub> | 432(2.85/4.25)  | 399 |     | N <sub>7</sub> C <sub>3</sub> N <sub>2</sub> (37)bend+S <sub>10</sub> C <sub>5</sub> N <sub>4</sub> (18)bend+H <sub>11</sub> N <sub>4</sub> C <sub>3</sub> N <sub>7</sub> (16)tors                                                                                                   |
| v <sub>24</sub> | 322(0.471/5.10) |     |     | N <sub>4</sub> C <sub>3</sub> N <sub>2</sub> N <sub>1</sub> (36)tors+N <sub>7</sub> N <sub>4</sub> N <sub>2</sub> C <sub>3</sub> (36)out                                                                                                                                             |
| v <sub>25</sub> | 271(1.68/38.6)  | 289 |     | N <sub>7</sub> C <sub>3</sub> N <sub>2</sub> (12)bend+S <sub>10</sub> C <sub>5</sub> N <sub>4</sub> (20)bend+H <sub>8</sub> N <sub>7</sub> C <sub>3</sub> N <sub>4</sub> (16)tors+H <sub>9</sub> N <sub>7</sub> C <sub>3</sub> N <sub>4</sub> (41)tors                               |
| v <sub>26</sub> | 244(3.78/10.6)  | 260 |     | N <sub>7</sub> C <sub>3</sub> N <sub>2</sub> (14)bend+S <sub>10</sub> C <sub>5</sub> N <sub>4</sub> (44)bend+H <sub>8</sub> N <sub>7</sub> C <sub>3</sub> N <sub>4</sub> (14)tors+H <sub>9</sub> N <sub>7</sub> C <sub>3</sub> N <sub>4</sub> (13)tors                               |
| v <sub>27</sub> | 149(0.576/2.28) |     |     | C <sub>5</sub> N <sub>1</sub> N <sub>2</sub> C <sub>3</sub> (43)tors+ N <sub>4</sub> C <sub>3</sub> N <sub>2</sub> N <sub>1</sub> (17)tors + S <sub>10</sub> N <sub>1</sub> N <sub>4</sub> C <sub>5</sub> (26)out                                                                    |

**Table S2.** 266 nm resonance Raman spectra and calculated vibrational frequencies at B3LYP-D3(BJ)/6-311++G(d, p) level using H<sub>2</sub>O PCM model and assignments of thione AMT in solvents

| Modes           | Calc.(Raman activity /IR activity) <sup>a</sup> | Exp.               |                  | Description (PED%)                                                                                                                                                                               |
|-----------------|-------------------------------------------------|--------------------|------------------|--------------------------------------------------------------------------------------------------------------------------------------------------------------------------------------------------|
|                 |                                                 | CH <sub>3</sub> OH | H <sub>2</sub> O |                                                                                                                                                                                                  |
| v <sub>5</sub>  | 1669(113/681)                                   | 1646               | 1656             | N <sub>2</sub> C <sub>3</sub> (25)stretch+N <sub>7</sub> C <sub>3</sub> (26)stretch+H <sub>9</sub> N <sub>7</sub> H <sub>8</sub> (27)bend                                                        |
| v <sub>6</sub>  | 1627(31/112)                                    | 1619               | 1615             | N <sub>2</sub> C <sub>3</sub> (16)stretch+H <sub>9</sub> N <sub>7</sub> H <sub>8</sub> (55)bend                                                                                                  |
| v <sub>7</sub>  | 1519(104/359)                                   | 1524               | 1528             | N <sub>1</sub> C <sub>5</sub> (23)stretch+H <sub>6</sub> N <sub>1</sub> N <sub>2</sub> (39)bend+N <sub>4</sub> C <sub>5</sub> N <sub>1</sub> (10)bend                                            |
| v <sub>8</sub>  | 1501 (147/387)                                  | 1491               | 1490             | N <sub>2</sub> C <sub>3</sub> (16)stretch+N <sub>4</sub> C <sub>3</sub> (30)stretch+H <sub>11</sub> N <sub>4</sub> C <sub>3</sub> (11)bend+H <sub>8</sub> N <sub>7</sub> C <sub>3</sub> (12)bend |
| v <sub>9</sub>  | 1363(25/23)                                     | 1378               | 1386             | N <sub>4</sub> C <sub>5</sub> (21)stretch+H <sub>6</sub> N <sub>1</sub> N <sub>2</sub> (23)bend+H <sub>11</sub> N <sub>4</sub> C <sub>3</sub> (33)bend                                           |
| v <sub>10</sub> | 1303(6/3)                                       | 1307               | 1319             | N <sub>1</sub> C <sub>5</sub> (38)stretch+ H <sub>6</sub> N <sub>1</sub> N <sub>2</sub> (18)bend                                                                                                 |
| v <sub>11</sub> | 1194(117/117)                                   | 1210               | 1220             | N <sub>1</sub> C <sub>5</sub> (12)stretch+S <sub>10</sub> C <sub>5</sub> (10)stretch+H <sub>6</sub> N <sub>1</sub> N <sub>2</sub> (11)bend+                                                      |

|                 |                |     |      |                                                                                                                                                                                                                 |
|-----------------|----------------|-----|------|-----------------------------------------------------------------------------------------------------------------------------------------------------------------------------------------------------------------|
|                 |                |     |      | H <sub>11</sub> N <sub>4</sub> C <sub>3</sub> (19)bend+ N <sub>4</sub> C <sub>5</sub> N <sub>1</sub> (19)bend                                                                                                   |
| v <sub>12</sub> | 1165(24/196)   |     |      | N <sub>2</sub> C <sub>3</sub> (15)stretch+N <sub>4</sub> C <sub>5</sub> (24)stretch+H <sub>8</sub> N <sub>7</sub> C <sub>3</sub> (19)bend+<br>N <sub>4</sub> C <sub>5</sub> N <sub>1</sub> (10)bend             |
| v <sub>13</sub> | 1056(7.8/73)   |     |      | N <sub>2</sub> C <sub>3</sub> N <sub>4</sub> (10)bend+H <sub>8</sub> N <sub>7</sub> C <sub>3</sub> (36)bend+C <sub>3</sub> N <sub>4</sub> C <sub>5</sub> (29)bend                                               |
| v <sub>14</sub> | 1042(59/1)     |     |      | N <sub>4</sub> C <sub>5</sub> (14)stretch+ N <sub>4</sub> C <sub>5</sub> N <sub>1</sub> (41)bend                                                                                                                |
| v <sub>15</sub> | 1010(11/47)    | 989 | 1004 | N <sub>4</sub> C <sub>3</sub> (52)stretch+ N <sub>2</sub> C <sub>3</sub> N <sub>4</sub> (16)bend                                                                                                                |
| v <sub>16</sub> | 759(9.7/10)    |     | 804  | N <sub>7</sub> C <sub>3</sub> (29)stretch+N <sub>2</sub> C <sub>3</sub> N <sub>4</sub> (32)bend+C <sub>3</sub> N <sub>4</sub> C <sub>5</sub> (12)bend                                                           |
| v <sub>17</sub> | 724(2.8/13.8)  | 754 | 724  | N <sub>2</sub> C <sub>3</sub> N <sub>4</sub> C <sub>5</sub> (32)tors+N <sub>7</sub> N <sub>4</sub> N <sub>2</sub> C <sub>3</sub> (49)out                                                                        |
| v <sub>18</sub> | 659(3/43)      | 643 | 658  | H <sub>6</sub> N <sub>1</sub> N <sub>2</sub> C <sub>3</sub> (13)tors+C <sub>3</sub> N <sub>4</sub> C <sub>5</sub> N <sub>1</sub> (39)tors+S <sub>10</sub> N <sub>1</sub> N <sub>4</sub> C <sub>5</sub> (37)out  |
| v <sub>19</sub> | 574(1/478)     |     |      | H <sub>9</sub> N <sub>7</sub> H <sub>8</sub> (11)bend+H <sub>8</sub> N <sub>7</sub> C <sub>3</sub> N <sub>4</sub> (49)tors+H <sub>9</sub> N <sub>7</sub> C <sub>3</sub> N <sub>4</sub> (26)tors                 |
| v <sub>20</sub> | 541(0.3/260)   |     |      | H <sub>6</sub> N <sub>1</sub> N <sub>2</sub> C <sub>3</sub> (17)tors+H <sub>11</sub> N <sub>4</sub> C <sub>3</sub> N <sub>7</sub> (56)tors+S <sub>10</sub> N <sub>1</sub> N <sub>4</sub> C <sub>5</sub> (10)out |
| v <sub>21</sub> | 506(20/38)     |     | 509  | S <sub>10</sub> C <sub>5</sub> (50)stretch+ C <sub>3</sub> N <sub>4</sub> C <sub>5</sub> (18)bend                                                                                                               |
| v <sub>22</sub> | 481(1.6/35)    |     |      | H <sub>6</sub> N <sub>1</sub> N <sub>2</sub> C <sub>3</sub> (61)tors+ H <sub>11</sub> N <sub>4</sub> C <sub>3</sub> N <sub>7</sub> (26)tors                                                                     |
| v <sub>23</sub> | 448(14.8/13.5) |     | 457  | N <sub>7</sub> C <sub>3</sub> N <sub>2</sub> (51)bend+S <sub>10</sub> C <sub>5</sub> N <sub>4</sub> (21)bend                                                                                                    |
| v <sub>24</sub> | 337(1/20)      |     |      | N <sub>2</sub> C <sub>3</sub> N <sub>4</sub> C <sub>5</sub> (36)tors+C <sub>3</sub> N <sub>4</sub> C <sub>5</sub> N <sub>1</sub> (11)tors+N <sub>7</sub> N <sub>4</sub> N <sub>2</sub> C <sub>3</sub> (32)out   |
| v <sub>25</sub> | 279(1.6/52)    |     |      | H <sub>8</sub> N <sub>7</sub> C <sub>3</sub> N <sub>4</sub> (31)tors+ H <sub>9</sub> N <sub>7</sub> C <sub>3</sub> N <sub>4</sub> (51)tors                                                                      |
| v <sub>26</sub> | 249(10/2.5)    |     |      | N <sub>7</sub> C <sub>3</sub> N <sub>2</sub> (17)+ S <sub>10</sub> C <sub>5</sub> N <sub>4</sub> (61)bend                                                                                                       |

**Table S3.** Experimental and calculated triplet electronic transition energies, corresponding orbitals and oscillator strengths with the electronic transition character for the optimized T<sub>1</sub> state at B3LYP(TD)-D3(BJ)/6-31G\* level.

| States                                                                                                                                  | Orbitals(coefficient )                                                   | Electronic transition                                                                                                               | Transition Energy(nm) |              | Oscillator strength(f) |      |
|-----------------------------------------------------------------------------------------------------------------------------------------|--------------------------------------------------------------------------|-------------------------------------------------------------------------------------------------------------------------------------|-----------------------|--------------|------------------------|------|
|                                                                                                                                         |                                                                          |                                                                                                                                     | Calc                  | Expt         | Calc                   | Expt |
| AMT in CH <sub>3</sub> CN                                                                                                               |                                                                          |                                                                                                                                     |                       |              |                        |      |
| T <sub>1</sub>                                                                                                                          | 29→30(0.99635)                                                           | $\pi \rightarrow \pi^*$                                                                                                             | 1125.57               |              | 0.0000                 |      |
| <b>T<sub>2</sub></b>                                                                                                                    | <b>28→30(0.97857)</b>                                                    | <b><math>\pi \rightarrow \pi^*</math></b>                                                                                           | <b>565.44</b>         | <b>613</b>   | <b>0.1494</b>          |      |
| T <sub>3</sub>                                                                                                                          | 27→30(0.78374)                                                           | $\pi \rightarrow \pi^*$                                                                                                             | 357.42                |              | 0.0028                 |      |
| <b>T<sub>4</sub></b>                                                                                                                    | <b>27→30(0.49870)</b>                                                    | <b><math>\pi \rightarrow \pi^*</math></b>                                                                                           | <b>356.35</b>         | <b>328.2</b> | <b>0.0238</b>          |      |
| T <sub>5</sub>                                                                                                                          | 26→30(0.89785)                                                           | $\pi \rightarrow \pi^*$                                                                                                             | 322.97                |              | 0.0063                 |      |
| T <sub>6</sub>                                                                                                                          | 29→31(0.94498)                                                           | $\pi \rightarrow \pi^*$                                                                                                             | 297.46                |              | 0.0064                 |      |
| T <sub>7</sub>                                                                                                                          | 25→30(0.29788)<br>28→31(0.32522)                                         | $\pi \rightarrow \pi^*$<br>$\pi \rightarrow \pi^*$                                                                                  | 273.86                | 295.07       | 0.0398                 |      |
| 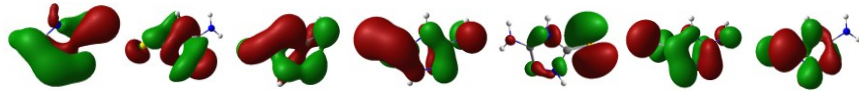<br>25π    26π    27π    28π    29π    30π*    31π*  |                                                                          |                                                                                                                                     |                       |              |                        |      |
| AMT in H <sub>2</sub> O                                                                                                                 |                                                                          |                                                                                                                                     |                       |              |                        |      |
| T <sub>1</sub>                                                                                                                          | 29→30(0.99632)                                                           | $\pi \rightarrow \pi^*$                                                                                                             | 1112.52               |              | 0.0000                 |      |
| <b>T<sub>2</sub></b>                                                                                                                    | <b>28→30(0.97863)</b>                                                    | <b><math>\pi \rightarrow \pi^*</math></b>                                                                                           | <b>564.82</b>         | <b>600</b>   | <b>0.1489</b>          |      |
| T <sub>3</sub>                                                                                                                          | 27→30(0.87456)                                                           | $\pi \rightarrow \pi^*$                                                                                                             | 357.50                |              | 0.0024                 |      |
| <b>T<sub>4</sub></b>                                                                                                                    | <b>27→30(0.31013)</b><br><b>28→30(0.15798)</b><br><b>28→31(-0.14434)</b> | <b><math>\pi \rightarrow \pi^*</math></b><br><b><math>\pi \rightarrow \pi^*</math></b><br><b><math>\pi \rightarrow \pi^*</math></b> | <b>355.57</b>         | <b>317.3</b> | <b>0.0243</b>          |      |
| T <sub>5</sub>                                                                                                                          | 26→30(0.89856)                                                           | $\pi \rightarrow \pi^*$                                                                                                             | 323.12                |              | 0.0062                 |      |
| T <sub>6</sub>                                                                                                                          | 29→31(0.94623)                                                           | $\pi \rightarrow \pi^*$                                                                                                             | 297.15                |              | 0.0064                 |      |
| T <sub>7</sub>                                                                                                                          | 25→30(0.30532)<br>28→31(0.33513)                                         | $\pi \rightarrow \pi^*$<br>$\pi \rightarrow \pi^*$                                                                                  | 273.18                | 292.21       | 0.0399                 |      |
| <br>25π    26π    27π    28π    29π    30π*    31π* |                                                                          |                                                                                                                                     |                       |              |                        |      |



**Table S4.** Transition orbital nature and energy (kcal/mol) corresponding to the ground structures in Figure S1

|             | States         | Orbitals(coefficient )                                                  | Electronic transition        | Transition Energy (kcal/mol) |                                                                                                              |
|-------------|----------------|-------------------------------------------------------------------------|------------------------------|------------------------------|--------------------------------------------------------------------------------------------------------------|
| -10(thione) | S <sub>1</sub> | 29→31(0.70424)                                                          | n→π*                         | 133.2                        | 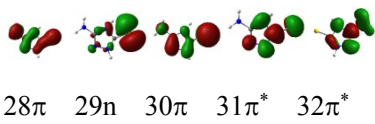<br>28π 29n 30π 31π* 32π* |
|             | S <sub>2</sub> | 30→31(0.67205)<br>30→32(0.17648)                                        | π→π*<br>π→π*                 | 141.2                        |                                                                                                              |
|             | S <sub>3</sub> | 30→32(0.63838)<br>28→31(-0.23277)                                       | π→π*<br>π→π*                 | 156.8                        |                                                                                                              |
| -8          | S <sub>1</sub> | 29→31(0.70315)                                                          | n→π*                         | 141.6                        | <br>28π 29n 30π 31π* 32π* |
|             | S <sub>2</sub> | 30→31(0.66720)<br>30→32(0.17646)<br>29→33(-0.11105)                     | π→π*<br>π→π*<br>n→π*         | 147.2                        |                                                                                                              |
|             | S <sub>3</sub> | 28→31(-0.19022)<br>30→31(-0.11702)<br>30→32(0.50303)<br>30→33(-0.42931) | π→π*<br>π→π*<br>π→π*<br>π→π* | 162.9                        |                                                                                                              |
| -6          | S <sub>1</sub> | 29→31(0.68931)<br>30→31(0.11686)                                        | n→π*<br>π→π*                 | 152.1                        | <br>29n 30π 31π* 32π*    |
|             | S <sub>2</sub> | 30→31(0.64839)<br>29→31(-0.12649)<br>29→33(0.15282)                     | π→π*<br>n→π*<br>n→π*         | 154.0                        |                                                                                                              |
|             | S <sub>3</sub> | 30→32(0.27441)<br>30→33(0.63972)                                        | π→π*<br>π→π*                 | 162.4                        |                                                                                                              |
| -4          | S <sub>1</sub> | 30→32(0.63128)<br>30→31(0.23986)<br>29→31(0.16847)                      | π→π*<br>π→π*<br>n→π*         | 159.3                        | <br>29n 30π 31π* 32π*   |
|             | S <sub>2</sub> | 30→31(0.59728)<br>29→32(0.21265)<br>30→32(-0.24480)<br>30→33(0.15849)   | π→π*<br>n→π*<br>π→π*<br>π→π* | 161.1                        |                                                                                                              |
|             | S <sub>3</sub> | 29→31(0.68285)<br>30→32(-0.17108)                                       | n→π*<br>π→π*                 | 164.8                        |                                                                                                              |
| -2          | S <sub>1</sub> | 30→32(0.67820)<br>28→32(0.11368)<br>30→31(0.15010)                      | π→π*<br>π→π*<br>π→π*         | 157.1                        | <br>28π 29n 30π 31π*    |
|             | S <sub>2</sub> | 30→31(0.61272)<br>29→32(0.25959)<br>30→32(-0.13736)<br>30→33(0.14017)   | π→π*<br>n→π*<br>π→π*<br>π→π* | 166.8                        |                                                                                                              |
|             | S <sub>3</sub> | 29→31(0.68760)<br>29→32(-0.11689)                                       | n→π*<br>n→π*                 | 176.3                        |                                                                                                              |

|           |                |                                                                                  |                                                                                                        |       |                                                                                       |
|-----------|----------------|----------------------------------------------------------------------------------|--------------------------------------------------------------------------------------------------------|-------|---------------------------------------------------------------------------------------|
| 0         | S <sub>1</sub> | 30 → 31 (0.69063)<br>29 → 31 (0.14302)                                           | $\pi \rightarrow \pi^*$<br>$\pi \rightarrow \pi^*$                                                     | 154.5 |    |
|           | S <sub>2</sub> | 30 → 32 (0.61848)<br>28 → 31 (0.28304)<br>29 → 32 (0.11623)<br>30 → 33 (0.12864) | $\pi \rightarrow \pi^*$<br>$n \rightarrow \pi^*$<br>$\pi \rightarrow \pi^*$<br>$\pi \rightarrow \pi^*$ | 170.7 |    |
|           | S <sub>3</sub> | 28 → 32 (0.13753)<br>29 → 31 (0.67328)<br>30 → 31 (-0.14716)                     | $n \rightarrow \pi^*$<br>$\pi \rightarrow \pi^*$<br>$\pi \rightarrow \pi^*$                            | 179.8 |                                                                                       |
| 2         | S <sub>1</sub> | 30 → 31 (0.68505)<br>29 → 31 (0.16922)                                           | $\pi \rightarrow \pi^*$<br>$\pi \rightarrow \pi^*$                                                     | 151.4 |    |
|           | S <sub>2</sub> | 30 → 32 (0.61071)<br>28 → 31 (0.29529)<br>29 → 32 (0.12970)<br>30 → 33 (0.12200) | $\pi \rightarrow \pi^*$<br>$n \rightarrow \pi^*$<br>$\pi \rightarrow \pi^*$<br>$\pi \rightarrow \pi^*$ | 172.2 |    |
|           | S <sub>3</sub> | 29 → 31 (0.68087)<br>30 → 31 (-0.17085)                                          | $\pi \rightarrow \pi^*$<br>$\pi \rightarrow \pi^*$                                                     | 174.9 |                                                                                       |
| 4         | S <sub>1</sub> | 30 → 31 (0.67888)<br>29 → 31 (0.19129)                                           | $\pi \rightarrow \pi^*$<br>$\pi \rightarrow \pi^*$                                                     | 148.1 |    |
|           | S <sub>2</sub> | 29 → 31 (0.67540)<br>30 → 31 (-0.19254)                                          | $\pi \rightarrow \pi^*$<br>$\pi \rightarrow \pi^*$                                                     | 170.0 |  |
|           | S <sub>3</sub> | 28 → 31 (0.29526)<br>29 → 32 (0.12345)<br>30 → 32 (0.61112)<br>30 → 33 (0.11399) | $n \rightarrow \pi^*$<br>$\pi \rightarrow \pi^*$<br>$\pi \rightarrow \pi^*$<br>$\pi \rightarrow \pi^*$ | 171.3 |                                                                                       |
| 6         | S <sub>1</sub> | 29 → 31 (0.20580)<br>30 → 31 (0.67405)                                           | $\pi \rightarrow \pi^*$<br>$\pi \rightarrow \pi^*$                                                     | 145.1 |  |
|           | S <sub>2</sub> | 29 → 31 (0.67254)<br>30 → 31 (-0.20789)                                          | $\pi \rightarrow \pi^*$<br>$\pi \rightarrow \pi^*$                                                     | 165.8 |  |
|           | S <sub>3</sub> | 28 → 31 (-0.27753)<br>30 → 32 (0.62486)<br>30 → 33 (0.11105)                     | $n \rightarrow \pi^*$<br>$\pi \rightarrow \pi^*$<br>$\pi \rightarrow \text{Ryd}$                       | 168.8 |                                                                                       |
| 8         | S <sub>1</sub> | 29 → 31 (0.21251)<br>30 → 31 (0.67141)                                           | $\pi \rightarrow \pi^*$<br>$\pi \rightarrow \pi^*$                                                     | 142.7 |  |
|           | S <sub>2</sub> | 29 → 31 (0.67018)<br>30 → 31 (-0.21527)                                          | $\pi \rightarrow \pi^*$<br>$\pi \rightarrow \pi^*$                                                     | 162.6 |  |
|           | S <sub>3</sub> | 28 → 31 (-0.23729)<br>30 → 32 (0.64449)                                          | $n \rightarrow \pi^*$<br>$\pi \rightarrow \pi^*$                                                       | 165.6 |                                                                                       |
| 10(thiol) | S <sub>1</sub> | 29 → 31 (0.21347)<br>30 → 31 (0.67073)                                           | $\pi \rightarrow \pi^*$<br>$\pi \rightarrow \pi^*$                                                     | 140.6 |  |
|           | S <sub>2</sub> | 29 → 31 (0.66943)<br>30 → 31 (-0.21673)                                          | $\pi \rightarrow \pi^*$<br>$\pi \rightarrow \pi^*$                                                     | 160.4 |  |
|           | S <sub>3</sub> | 28 → 31 (-0.18657)<br>30 → 32 (0.66030)<br>30 → 33 (0.10832)                     | $n \rightarrow \pi^*$<br>$\pi \rightarrow \pi^*$<br>$\pi \rightarrow \text{Ryd}$                       | 162.4 |                                                                                       |
